# Supplementary material
Source: PubMed Central journal article supplement (PMC4077971)
Supplement: NIHMS571223-supplement-Supp_material.pdf [file NIHMS571223-supplement-Supp_material.pdf]

**Supporting Fig. 1.** Rare contribution of the MesP1<sup>+</sup> mesoderm to Kupffer cells. Cell lineage tracing using the MesP1<sup>Cre</sup> and R26T/G<sup>flox</sup> mice. (A-D) Immunohistochemistry of the adult MesP1<sup>Cre/+</sup>;R26T/G<sup>f/f</sup> mouse liver for GFP with PDPN (A), CD31/PECAM1 (B), CD45 (C), or F4/80 (D). (A) No GFP expression in PDPN<sup>+</sup> bile duct (bd) and lymphatic endothelial cells (lv). ha, hepatic artery. (B) Asterisks indicate CD31<sup>+</sup> sinusoidal endothelial cells (sec), which are located in close proximity to GFP<sup>+</sup> HSCs (hsc, arrows). No GFP expression in hepatocytes (hc). (C) No GFP expression in CD45 leukocytes in the sinusoid. (D) A rare GFP<sup>+</sup> F4/80<sup>+</sup> Kupffer cell. (E) Immunostaining of GFP and DES in the MesP1<sup>+/+</sup>;R26T/G<sup>f/f</sup> mouse liver. No GFP expression. (F) Negative control without primary antibodies. Nuclei were counterstained with DAPI. Scale bar is 10  $\mu$ m.

**Supporting Fig. 2.** No contribution of mesodermal mesenchymal cells to hepatocytes and cholangiocytes in the regenerating liver. Lineage of mesodermal mesenchymal cells was traced using the MesP1<sup>Cre/+</sup>;R26T/G<sup>f/f</sup> mouse. After induction of oval cells by DDC diet for 4 weeks, we changed the diet to the normal chow and induced regeneration for 4 weeks. (A) Expression of TOMATO and GFP in the liver. No GFP expression in TOMATO<sup>+</sup> hepatocytes (hc). bd, bile duct; pv, portal vein. (B-F) Immunohistochemistry of the regenerating liver with antibodies against GFP and ACTA2 (B), EPCAM (C), CK19 (D), CDH1 (E), or HNF4 (F). (B) No ACTA2 expression in GFP<sup>+</sup> HSCs (hsc) in the sinusoid. ha, hepatic artery. (C) No GFP expression in EPCAM<sup>+</sup> cholangiocytes. Arrowheads indicate GFP<sup>+</sup> mesenchymal cells adjacent to EPCAM<sup>+</sup> GFP<sup>-</sup> cholangiocytes. (D-F) No GFP expression in CK19<sup>+</sup> CDH1<sup>+</sup> cholangiocytes and CDH1<sup>+</sup>

HNF4+ hepatocytes (2,072 HNF4+ hepatocytes and 1,002 CK19+ cholangiocytes examined, n=2). Nuclei were counterstained with DAPI. Scale bar is 10  $\mu$ m.

# Supporting Figure 1

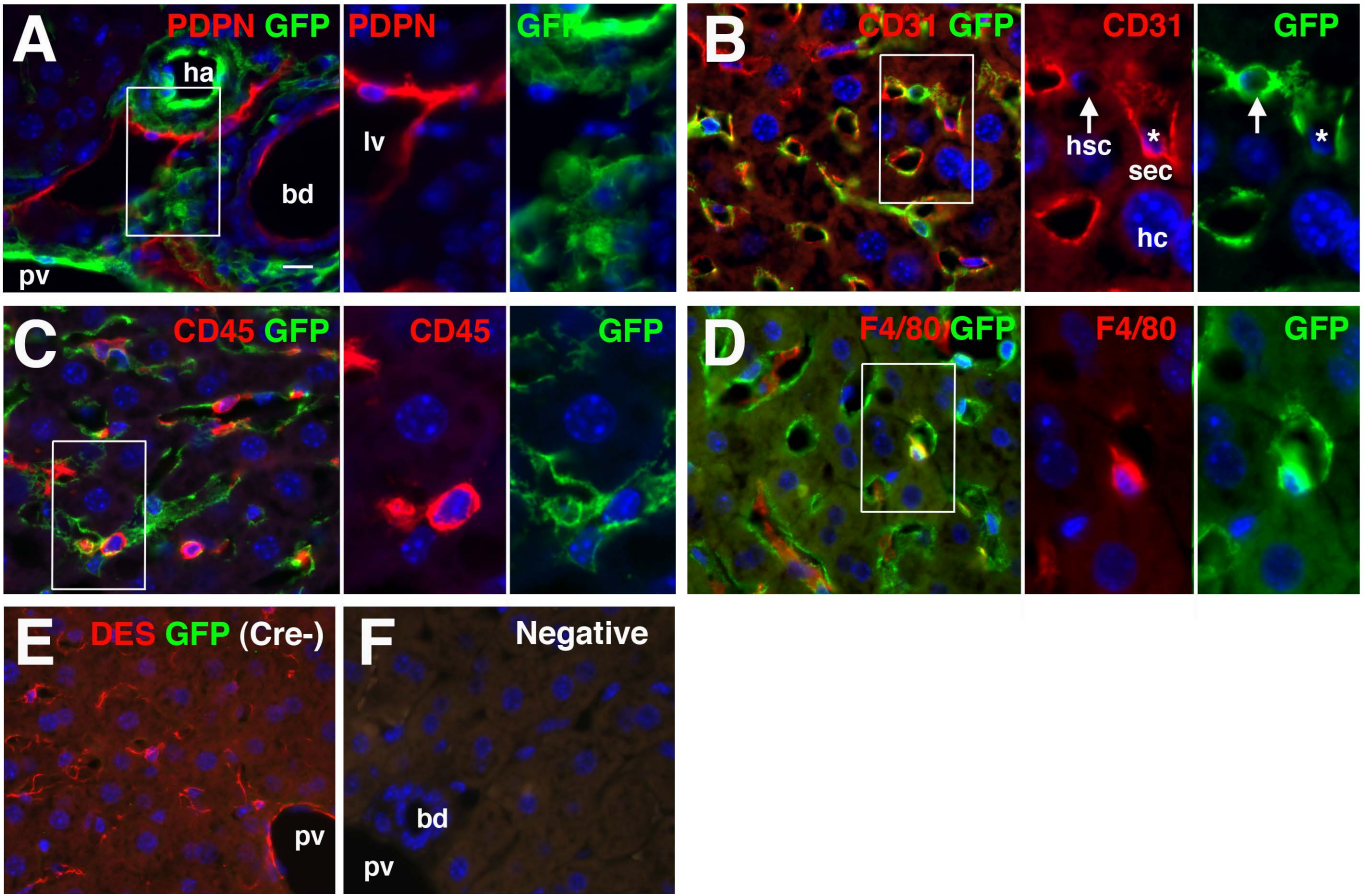

# Supporting Figure 2

DDC 4 weeks → Chow 4 weeks

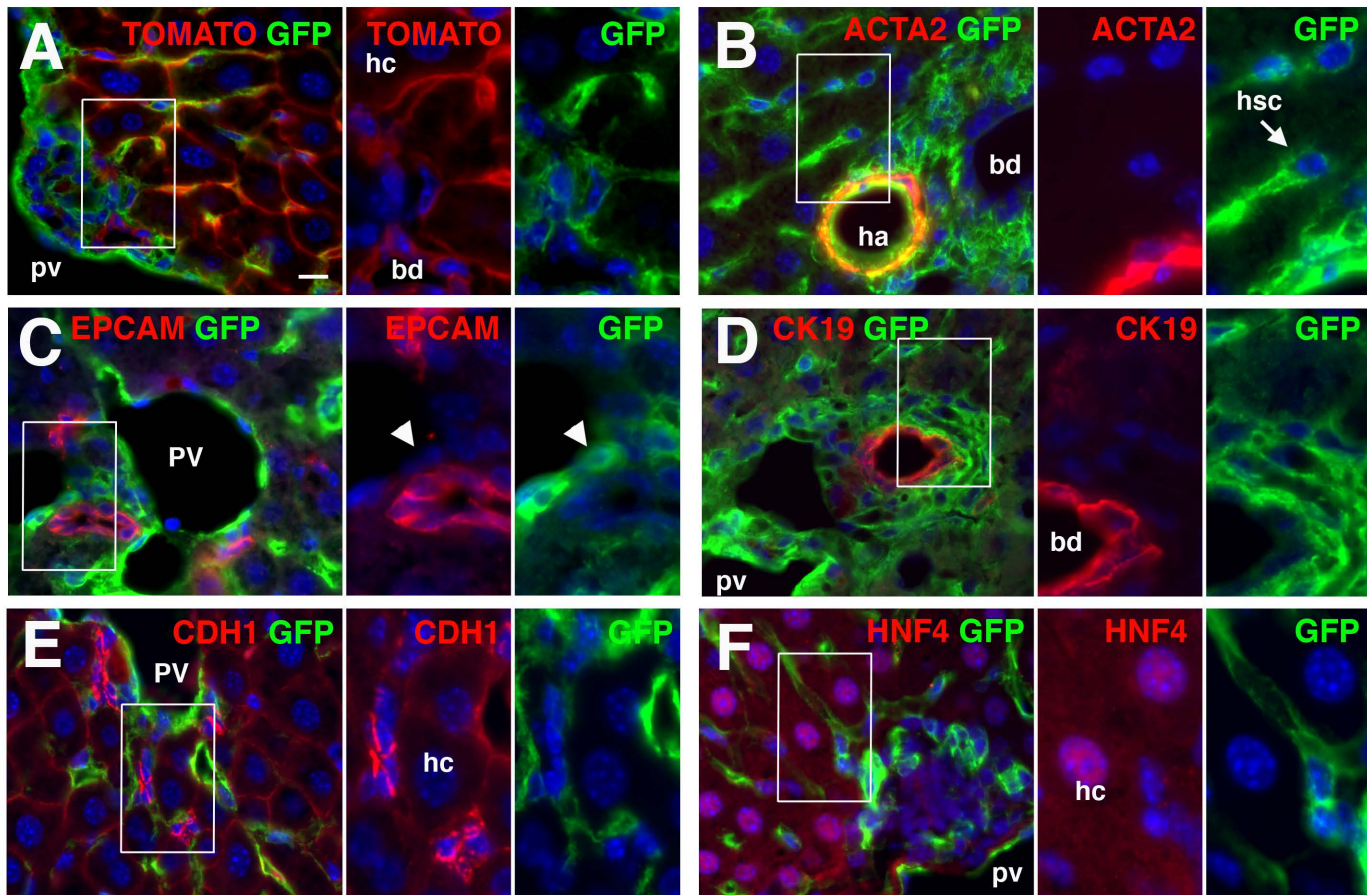

**Supporting Table 1. List of antibodies for immunostaining**

| Antibodies                                   | Maker (catalog no.)         | Fixation* | Dilution |
|----------------------------------------------|-----------------------------|-----------|----------|
| <b>Primary</b>                               |                             |           |          |
| Goat anti-human HNF4                         | Santa Cruz (sc-6556)        | PFA       | 200      |
| Hamster anti-mouse Podoplanin                | eBioscience (14-5381)       | PFA       | 50       |
| Mouse anti-Actin $\alpha$ -smooth muscle-Cy3 | Sigma (C6198)               | PFA       | 200      |
| Rabbit anti-GFP                              | Invitrogen (A11122)         | PFA       | 800      |
| Rabbit anti-human Desmin                     | Thermo Scientific (RB-9014) | PFA       | 300      |
| Rabbit anti-rat Elastin                      | Cedarlane (CL55041AP)       | PFA       | 200      |
| Rat anti-GFP                                 | Nacalai Tesque (04404-84)   | PFA       | 1,000    |
| Rat anti-mouse A6                            | Valentina M. Factor, NCI    | ☞         | 100      |
| Rat anti-mouse CD31                          | BD Pharmingen (550274)      | PFA       | 100      |
| Rat anti-mouse CD45                          | eBioscience (13-0451)       | PFA       | 200      |
| Rat anti-mouse CD90.2                        | BD Pharmingen (553011)      | PFA       | 200      |
| Rat anti-mouse CD133                         | eBioscience (14-1331)       | PFA       | 100      |
| Rat anti Cytokeratin 19                      | DSHB (Troma-III)            | Ethanol   | 50       |
| Rat anti-mouse E-cadherin                    | Zymed (13-1900)             | Ethanol   | 100      |
| Rat anti-mouse EPCAM                         | DSHB (G8.8)                 | PFA       | ☞        |
| Rat anti-mouse F4/80                         | eBioscience (13-4801)       | PFA       | 1,000    |
| <b>Secondary</b>                             |                             |           |          |
| Alexa Fluor 488 Donkey anti-rat IgG          | Invitrogen (A-21208)        |           | 400      |
| Alexa Fluor 488 Goat anti-rabbit IgG         | Invitrogen (A-11008)        |           | 400      |
| Alexa Fluor 488 Goat anti-rat IgG            | Invitrogen (A-11006)        |           | 400      |
| Alexa Fluor 568 Donkey anti-goat IgG         | Invitrogen (A-11057)        |           | 400      |
| Alexa Fluor 568 Goat anti-hamster IgG        | Invitrogen (A-21112)        |           | 400      |
| Alexa Fluor 568 Goat anti-rabbit IgG         | Invitrogen (A-11011)        |           | 400      |
| Alexa Fluor 568 Goat anti-rat IgG            | Invitrogen (A-11077)        |           | 400      |

\*PFA, paraformaldehyde.

## Supporting Table 2

List of primers for QPCR

| <b>Genes</b>  | <b>Forward Primer (5'-3')</b> | <b>Reverse Primer (5'-3')</b> |
|---------------|-------------------------------|-------------------------------|
| <i>Acta2</i>  | CTGAGCGTGGCTATTCCTTC          | CTTCTGCATCCTGTCAGCAA          |
| <i>Alb</i>    | TGCTGCTGATTTTGTTGAGG          | AGAGTTGGGGTTGACACCTG          |
| <i>Cd31</i>   | GAATGACACCCAAGCGTTTT          | GGCTTCCACACTAGGCTCAG          |
| <i>Cd68</i>   | CCAATTCAGGGTGAAGAAA           | TTGCATTTCCACAGCAGAAG          |
| <i>Colla1</i> | CACCCTCAAGAGCCTGAGTC          | GTTCCGGGCTGATGTACCAGT         |
| <i>Des</i>    | CAGGACCTGCTCAATGTGAA          | GTAGCCTCGCTGACAACCTC          |
| <i>Gapdh</i>  | CGTCCCGTAGACAAAATGGT          | GAATTTGCCGTGAGTGGAGT          |
| <i>Hgf</i>    | TTCCCAGCTGGTCTATGGTC          | TGGTGCTGACTGCATTTCTC          |
| <i>Tgfb1</i>  | TTGCTTCAGCTCCACAGAGA          | TGGTTGTAGAGGGCAAGGAC          |
| <i>Timp1</i>  | GTAAGGCCTGTAGCTGTGCC          | AGGTGGTCTCGTTGATTTCT          |
